# Supplementary material for: Genetic Epidemiology and Clinical Features of Hereditary Hearing Impairment in the Taiwanese Population
Source: PubMed Central journal article supplement (PMC6826657; doi:10.3390/genes10100772), 2019-10-01
Supplement: genes-10-00772-s001.pdf [file genes-10-00772-s001.pdf]

## Supplementary Material

**Table S1.** All NCBI Reference Sequences of other deafness genes.

| <b>Variants</b> | <b>NCBI Reference Sequence</b>  |
|-----------------|---------------------------------|
| <i>KCNQ4</i>    | NM_004700.3 / NP_004691.2       |
| <i>MYO7A</i>    | NM_000260.3 / NP_000251.3       |
| <i>POU3F4</i>   | NM_000307.4 / NP_000298.3       |
| <i>EYA1</i>     | NM_000503.5 / NP_000494.2       |
| <i>TECTA</i>    | NM_005422.2 / NP_005413.2       |
| <i>POU4F3</i>   | NM_002700.3 / NP_002691.1       |
| <i>MITF</i>     | NM_198159.2 / NP_937802.1       |
| <i>PJVK</i>     | NM_001042702.4 / NP_001036167.1 |
| <i>COL4A5</i>   | NM_033380.2 / NP_203699.1       |
| <i>WFS1</i>     | NM_006005.3 / NP_005996.2       |
| <i>SIX5</i>     | NM_175875.5 / NP_787071.3       |
| <i>GATA3</i>    | NM_001002295.2 / NP_001002295.1 |
| <i>TMPRSS3</i>  | NM_024022.3 / NP_076927.1       |
| <i>PAX3</i>     | NM_181459.4 / NP_852124.1       |
| <i>USH2A</i>    | NM_206933.3 / NP_996816.2       |
| <i>MYO6</i>     | NM_004999.4 / NP_004990.3       |
| <i>OTOG</i>     | NM_001277269.1 / NP_001264198.1 |
| <i>ATP6V1B2</i> | NM_001693.4 / NP_001684.2       |
| <i>SOX10</i>    | NM_006941.3 / NP_008872.1       |
| <i>PTPRQ</i>    | NM_001145026.2 / NP_001138498.1 |
| <i>EPS8L2</i>   | NM_022772.4 / NP_073609.2       |
| <i>EDNRB</i>    | NM_001201397.1 / NP_001188326.1 |
